# Supplementary material for: The effect of beta-blockers in acute heart failure according to heart rate
Source: PubMed Central journal article supplement — Korean J Intern Med. 2020 Sep 21;36(4):898–905. doi: 10.3904/kjim.2020.270 (PMC8273820; doi:10.3904/kjim.2020.270), 2020-09-21
Supplement: kjim-2020-270-suppl1.pdf [file kjim-2020-270-suppl1.pdf]

**Supplementary Table 1. Study outcomes according to cause of heart failure**

| Variable                                                 | HR < 60 beats/min |                |                    |         | HR ≥ 60 beats/min |                  |                     |         |
|----------------------------------------------------------|-------------------|----------------|--------------------|---------|-------------------|------------------|---------------------|---------|
|                                                          | All<br>(n = 19)   | BBs<br>(n = 6) | No BBs<br>(n = 13) | p value | All<br>(n = 590)  | BBs<br>(n = 287) | No BBs<br>(n = 303) | p value |
| <b>Ischemic heart disease patients</b>                   |                   |                |                    |         |                   |                  |                     |         |
| All-cause death                                          | 4 (21.1)          | 1 (16.7)       | 3 (23.1)           | 1.000   | 130 (22.0)        | 44 (15.3)        | 86 (28.4)           | < 0.001 |
| Composite events of HF<br>readmission or all-cause death | 9 (47.4)          | 2 (33.3)       | 7 (63.8)           | 0.628   | 257 (43.6)        | 107 (37.3)       | 150 (49.5)          | 0.003   |
| <b>Valvular heart disease patients</b>                   |                   |                |                    |         |                   |                  |                     |         |
| All-cause death                                          | 1 (50.0)          | 1 (100.0)      | 0                  | 1.000   | 32 (22.1)         | 9 (17.3)         | 23 (24.7)           | 0.404   |
| Composite events of HF<br>readmission or all-cause death | 2 (100.0)         | 1 (100.0)      | 1 (100.0)          | -       | 62 (42.8)         | 20 (38.5)        | 42 (45.2)           | 0.486   |

Values are presented as number (%).

HR, heart rate; BB, beta-blocker; HF, heart failure.
