# Supplementary material for: The effect of beta-blockers in acute heart failure according to heart rate
Source: PubMed Central journal article supplement — Korean J Intern Med. 2020 Sep 21;36(4):898–905. doi: 10.3904/kjim.2020.270 (PMC8273820; doi:10.3904/kjim.2020.270), 2020-09-21
Supplement: kjim-2020-270-suppl2.pdf [file kjim-2020-270-suppl2.pdf]

**Supplementary Table 2. Study outcomes according to heart rhythm**

| Variable                                                 | Sinus rhythm       |                     |                    |         | Atrial fibrillation rhythm |                     |                    |         |
|----------------------------------------------------------|--------------------|---------------------|--------------------|---------|----------------------------|---------------------|--------------------|---------|
|                                                          | All<br>(n = 1,051) | BB use<br>(n = 432) | No BB<br>(n = 619) | p value | All<br>(n = 284)           | BB use<br>(n = 137) | No BB<br>(n = 147) | p value |
| All-cause death                                          | 192 (18.3)         | 47 (10.9)           | 145 (23.4)         | < 0.001 | 51 (18.0)                  | 13 (10.9)           | 36 (20.8)          | 0.026   |
| Composite events of HF<br>readmission or all-cause death | 410 (39.0)         | 139 (32.2)          | 271 (43.8)         | < 0.001 | 104 (35.6)                 | 34 (28.6)           | 70 (40.5)          | 0.037   |
| HR ≥ 60 beats/min                                        | 986                | 412                 | 574                |         | 270                        | 113                 | 157                |         |
| All-cause death                                          | 178 (18.1)         | 45 (10.9)           | 133 (23.2)         | < 0.001 | 47 (17.4)                  | 13 (11.5)           | 34 (21.7)          | 0.030   |
| Composite events of HF<br>readmission or all-cause death | 378 (38.3)         | 131 (31.8)          | 247 (43.0)         | < 0.001 | 99 (36.7)                  | 34 (30.1)           | 65 (41.4)          | 0.057   |
| HR < 60 beats/min                                        | 29                 | 8                   | 21                 |         | 17                         | 5                   | 12                 |         |
| All-cause death                                          | 4 (13.8)           | 1 (12.5)            | 3 (14.3)           | 1.000   | 1 (5.9)                    | 0                   | 1 (8.3)            | 1.000   |
| Composite events of HF<br>readmission or all-cause death | 11 (37.9)          | 3 (37.5)            | 8 (38.1)           | 1.000   | 3 (17.6)                   | 0                   | 3 (25.0)           | 0.218   |

Values are presented as number (%).

BB, beta-blocker; HF, heart failure; HR, heart rate.
