# Supplementary figures and images for: The effect of beta-blockers in acute heart failure according to heart rate
Source: PubMed Central journal article supplement — Korean J Intern Med. 2020 Sep 21;36(4):898–905. doi: 10.3904/kjim.2020.270 (PMC8273820; doi:10.3904/kjim.2020.270), 2020-09-21

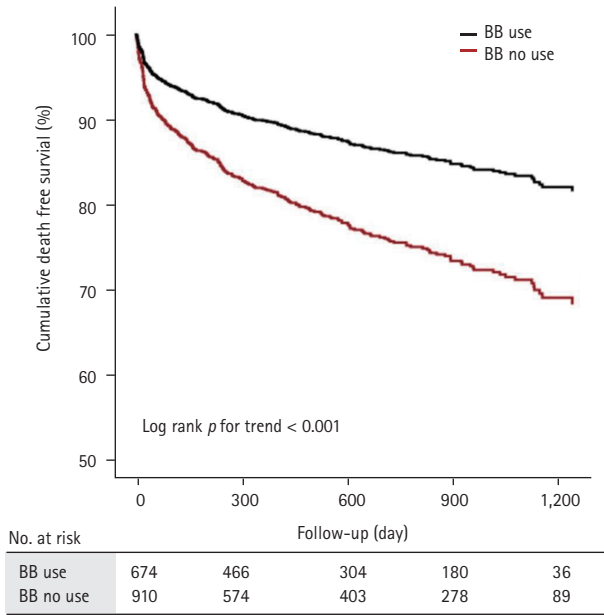

**Supplementary Figure 1.** Cumulative death-free survival rate according to beta-blocker (BB) use.

Supplement: kjim-2020-270-suppl3.pdf [file kjim-2020-270-suppl3.pdf]
